# Supplementary material for: Ultrafast synthesis of near-zero-cost S-doped Ni(OH)2 on C3N5 under ambient conditions with enhanced photocatalytic activity
Source: Royal Society of Chemistry journal article supplement (doi:10.1039/d1ra07275g), 2021-01-01
Supplement: d1ra07275g1.pdf [file d1ra07275g1.pdf]

Ultrafast synthesis of near-zero-cost S-doped Ni(OH)<sub>2</sub> on C<sub>3</sub>N<sub>5</sub> at ambient condition  
with enhanced photocatalytic activity

Lixiao Han#, Cong Peng#, Jinming Huang, Shengyao Wang, Xiaohu Zhang, Hao Chen,  
Yi Yang\*

College of Science, Huazhong Agricultural University, Wuhan 430070, PR China

[yiyang@mail.hzau.edu.cn](mailto:yiyang@mail.hzau.edu.cn)

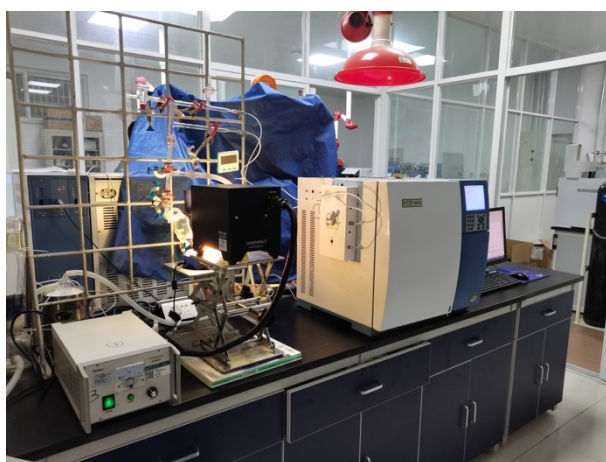

Fig. S1. The photograph of photocatalytic H<sub>2</sub> system.

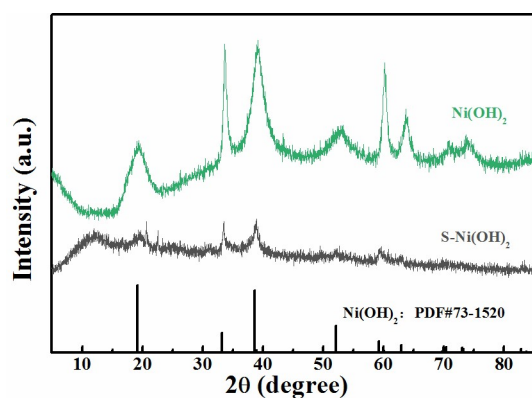

Fig. S2. XRD patterns of S-Ni(OH)<sub>2</sub> and Ni(OH)<sub>2</sub>.

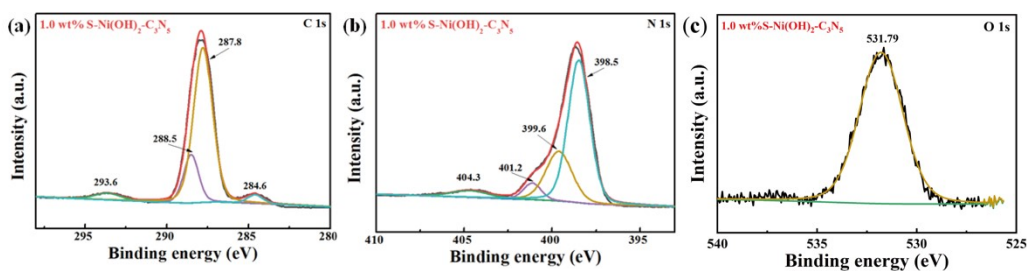

Fig. S3. High-resolution XPS spectra of C 1s (a), N 1s (b), and O 1s (c) of 1.0 wt% S-Ni(OH)<sub>2</sub>-C<sub>3</sub>N<sub>5</sub>.

Table S1. The element content of C, N, S, (determined by elemental analysis) and Ni (determined by ICP-MS) of the prepared S-Ni(OH)<sub>2</sub>-C<sub>3</sub>N<sub>5</sub> materials.

| Samples                                                      | N (wt%) | C (wt%) | S (wt%) | Ni (wt%) |
|--------------------------------------------------------------|---------|---------|---------|----------|
| 0.5 wt% S-Ni(OH) <sub>2</sub> -C <sub>3</sub> N <sub>5</sub> | 59.38   | 32.91   | 0.341   | 0.3      |
| 1.0 wt% S-Ni(OH) <sub>2</sub> -C <sub>3</sub> N <sub>5</sub> | 57.64   | 31.42   | 0.555   | 0.98     |
| 2.0 wt% S-Ni(OH) <sub>2</sub> -C <sub>3</sub> N <sub>5</sub> | 56.5    | 31.26   | 1.509   | 1.6      |

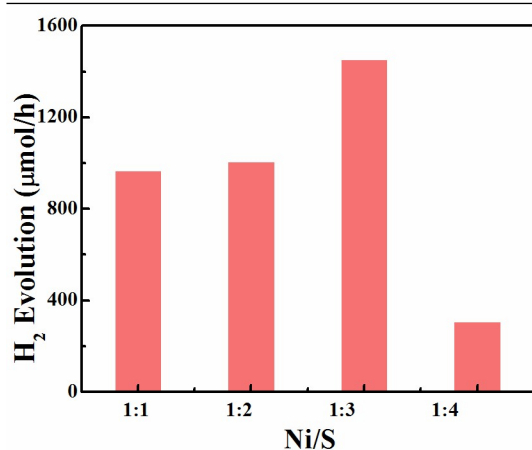

Fig. S4. Influence of mol ratio of Ni<sup>2+</sup>/Na<sub>2</sub>S on the H<sub>2</sub> production activity of 1.0 wt% S-Ni(OH)<sub>2</sub>-Ni(OH)<sub>2</sub>.

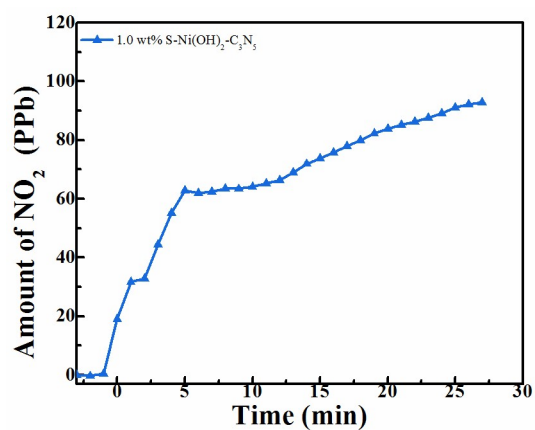

Fig. S5. Change tendency of NO<sub>2</sub> during NO oxidation procedure over 1.0 wt% S-Ni(OH)<sub>2</sub>-C<sub>3</sub>N<sub>5</sub>.

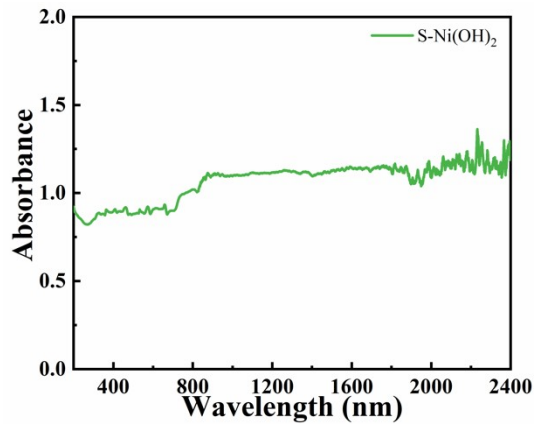

Fig. S6. The solid-state UV-Vis-NIR diffuse reflectance spectra (DRS) of S-Ni(OH)<sub>2</sub>.

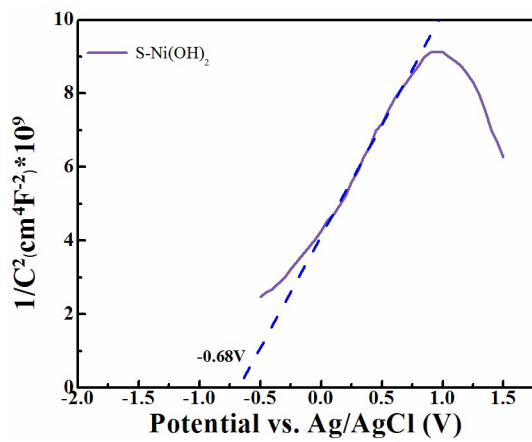

Fig. S7. The Mott - Schottky plots of S-Ni(OH)<sub>2</sub>.

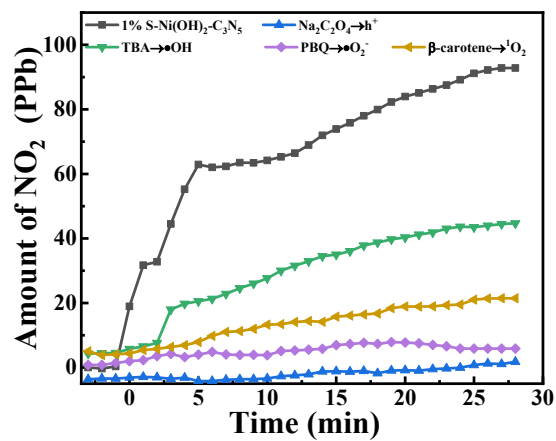

Fig. S8. The NO<sub>2</sub> concentration during the photocatalytic NO removal with scavengers on 1.0 wt% S-Ni(OH)<sub>2</sub>-C<sub>3</sub>N<sub>5</sub>.

Table S2. The residual ratio of NO<sub>2</sub> by using different scavengers on 1.0 wt% S-Ni(OH)<sub>2</sub>-C<sub>3</sub>N<sub>5</sub>.

| *Scavenger                           | No scavenger | Na <sub>2</sub> C <sub>2</sub> O <sub>4</sub> (h <sup>+</sup> ) | TBA (•OH)    | PBQ (•O <sub>2</sub> <sup>-</sup> ) | β-carotene ( <sup>1</sup> O <sub>2</sub> ) |
|--------------------------------------|--------------|-----------------------------------------------------------------|--------------|-------------------------------------|--------------------------------------------|
| **Residual ration of NO <sub>2</sub> | 26.4%        | 2.0%                                                            | <b>40.7%</b> | 20.0%                               | <b>35.0%</b>                               |

\* Na<sub>2</sub>C<sub>2</sub>O<sub>4</sub> for h<sup>+</sup>, TBA for •OH, PBQ for •O<sub>2</sub><sup>-</sup> and β-carotene for <sup>1</sup>O<sub>2</sub>

\*\*Residual ration of NO<sub>2</sub>=C<sub>NO2</sub>/ΔC<sub>NO</sub>
